# Supplementary material
Source: Research Square preprint supplement (doi:10.21203/rs.3.rs-8023968/v1)
Supplement: Supplementary file 1 [file a4c153cf0b3618d1c912c939.docx]

**Supplementary File 1**

**The Questionnaire**

The questionnaire employed in this study was not developed de novo but was adapted from the established Medical Leadership Competency Framework (MLCF). The original MLCF was developed by the UK’s Academy of Medical Royal Colleges and NHS Institute for Innovation and Improvement, and has been widely utilized and cited in health professions education literature (please see citation in manuscript, reference 3, 7).

For the purposes of this study, the framework’s core leadership domains were reviewed and refined through iterative discussions among the research team to enhance contextual relevance to sixth-year medical students. Minor modifications were made to item wording and structure to align with the target population and study objectives, resulting in a final instrument comprising 41 items.

Each item is measured on a 5-point Likert scale (1 = Strongly Disagree, 5 = Strongly Agree), anchored by the prompt: “To what extent do you agree that the following competencies are evident in sixth-year medical students?”

The full adapted questionnaire is provided here for transparency and reproducibility. While the instrument is derivative of a published framework, we acknowledge that the specific adaptation constitutes a modified version; therefore, we have elected to include it to ensure full methodological clarity for readers and reviewers.

| Domain / Item No. | Item Description |
| --- | --- |
| Domain 1 | Demonstrating Personal Qualities |
| AC1 | I deal with others based on my values and ethics |
| AC2 | I care about hearing feedback from others |
| AC3 | I strive to adjust my behavior based on the feedback of others |
| AC4 | I remain calm and balanced under work pressure |
| AC5 | I plan my work schedule and fulfil my obligations according to the standards in place |
| AC6 | I demonstrate flexibility in my performance based on the requirements of the job |
| AC7 | I always try to seek opportunities for learning and self-development |
| AC8 | I apply what I have learned theoretically to my practical work practices |
| AC9 | I sincerely respect the cultures and beliefs of others |
| AC10 | I do not remain silent when I see a breach of professional |
| Domain 2 | Working with Others |
| AC11 | I collaborate with others to achieve the development of patient care. |
| AC12 | I share information and resources with others through social networks |
| AC13 | I communicate transparently with others |
| AC14 | I listen to the complaints of others and consider their needs. |
| AC15 | I always strive to listen to the suggestions of others |
| AC16 | I trust in my ability to resolve differences of opinion and conflicting professional interests |
| AC17 | I strive to lead and choose the right people within the team |
| AC18 | I appreciate and respect the efforts and decisions of the work team |
| Domain 3 | Managing Services |
| AC19 | I appreciate and benefit from patient and colleague feedback when developing action plans. |
| AC20 | I am able to evaluate the risks and benefits of proposed solutions. |
| AC21 | I strive to provide safe and effective services within the available resources. |
| AC22 | I take necessary actions when resources are not being used efficiently. |
| AC23 | I support team members in developing their roles and responsibilities. |
| AC24 | I provide the team with advice and guidance to ensure quality work. |
| AC25 | I am able to analyse information from various sources. |
| AC26 | I take appropriate measures to improve work performance. |
| Domain 4 | Improving Services |
| AC27 | I intervene when I notice any shortcomings that threaten patient safety. |
| AC28 | I review work steps to improve patient safety and reduce risks whenever possible. |
| AC29 | I utilize feedback from patients and the care team to improve service performance. |
| AC30 | I collaborate with others to provide services effectively. |
| AC31 | I propose ideas to improve the quality of services provided. |
| AC32 | I discuss new ideas with experienced individuals. |
| AC33 | I strive to change and develop services to improve work quality. |
| AC34 | I motivate others to facilitate change and development. |
| Domain 5 | Setting Direction |
| AC35 | I anticipate future challenges that may create a need for change and communicate them to others. |
| AC36 | I use data and information to improve work service. |
| AC37 | I influence others using knowledge and scientific evidence to achieve best practices. |
| AC38 | I consult with decision-makers while considering values and service priorities. |
| AC39 | I contribute to making official and unofficial decisions about the future of services. |
| AC40 | I take responsibility for implementing new methods to develop work. |
| AC41 | I evaluate the impact of development and change on patients and healthcare service. |

**Table SM1. Internal Consistency of Leadership Domains Assessed by Cronbach’s Alpha**

| Leadership Domain | Cronbach's Alpha | Interpretation | Number of Items |
| --- | --- | --- | --- |
| Group 1 - Demonstrating Personal Qualities | 0.688 | Questionable | 10 |
| Group 2 - Working with Others | 0.776 | Acceptable | 8 |
| Group 3 - Managing Services | 0.836 | Good | 8 |
| Group 4 - Improving Services | 0.832 | Good | 8 |
| Group 5 - Setting Direction | 0.846 | Good | 7 |

**Table SM2. Item-Level Comparison of Leadership Competencies by Gender Using Mann-Whitney U Test** (Male vs. Female Responses)

| Item | Male [N=43]  Mean (SD) | Female [N=76]  Mean (SD) | Test Used | p-value | Significant? |
| --- | --- | --- | --- | --- | --- |
| AC1 | 4.58 (0.59) | 4.72 (0.53) | Mann-Whitney U | 0.132 | No |
| AC2 | 4.09 (0.87) | 3.75 (0.75) | Mann-Whitney U | 0.012 | Yes |
| AC3 | 3.53 (0.96) | 3.29 (0.95) | Mann-Whitney U | 0.183 | No |
| AC4 | 3.88 (0.76) | 3.61 (0.97) | Mann-Whitney U | 0.177 | No |
| AC5 | 4.00 (0.87) | 3.82 (0.93) | Mann-Whitney U | 0.324 | No |
| AC6 | 4.12 (0.66) | 4.08 (0.76) | Mann-Whitney U | 0.820 | No |
| AC7 | 3.93 (0.88) | 4.17 (0.79) | Mann-Whitney U | 0.166 | No |
| AC8 | 3.91 (0.81) | 3.95 (0.78) | Mann-Whitney U | 0.892 | No |
| AC9 | 4.44 (0.59) | 4.30 (0.75) | Mann-Whitney U | 0.442 | No |
| AC10 | 3.77 (0.68) | 3.68 (0.94) | Mann-Whitney U | 0.627 | No |
| AC11 | 4.16 (0.72) | 4.33 (0.57) | Mann-Whitney U | 0.271 | No |
| AC12 | 3.77 (0.95) | 3.70 (1.05) | Mann-Whitney U | 0.813 | No |
| AC13 | 3.88 (0.76) | 4.00 (0.80) | Mann-Whitney U | 0.549 | No |
| AC14 | 4.14 (0.68) | 4.24 (0.61) | Mann-Whitney U | 0.468 | No |
| AC15 | 4.02 (0.74) | 3.86 (0.80) | Mann-Whitney U | 0.278 | No |
| AC16 | 3.77 (0.92) | 3.78 (0.87) | Mann-Whitney U | 0.954 | No |
| AC17 | 4.09 (0.75) | 4.04 (0.90) | Mann-Whitney U | 1.000 | No |
| AC18 | 4.12 (0.63) | 4.22 (0.62) | Mann-Whitney U | 0.366 | No |
| AC19 | 4.21 (0.67) | 4.16 (0.65) | Mann-Whitney U | 0.693 | No |
| AC20 | 3.81 (0.79) | 3.82 (0.84) | Mann-Whitney U | 0.981 | No |
| AC21 | 4.28 (0.67) | 4.17 (0.81) | Mann-Whitney U | 0.642 | No |
| AC22 | 3.95 (0.75) | 3.74 (0.87) | Mann-Whitney U | 0.235 | No |
| AC23 | 4.12 (0.82) | 4.03 (0.73) | Mann-Whitney U | 0.461 | No |
| AC24 | 3.98 (0.64) | 4.07 (0.72) | Mann-Whitney U | 0.433 | No |
| AC25 | 3.79 (0.74) | 3.83 (0.77) | Mann-Whitney U | 0.795 | No |
| AC26 | 4.02 (0.77) | 4.03 (0.75) | Mann-Whitney U | 0.880 | No |
| AC27 | 4.23 (0.72) | 4.11 (0.95) | Mann-Whitney U | 0.715 | No |
| AC28 | 4.07 (0.74) | 4.17 (0.74) | Mann-Whitney U | 0.430 | No |
| AC29 | 4.14 (0.64) | 4.17 (0.62) | Mann-Whitney U | 0.756 | No |
| AC30 | 4.19 (0.73) | 4.22 (0.69) | Mann-Whitney U | 0.842 | No |
| AC31 | 4.07 (0.86) | 3.99 (0.68) | Mann-Whitney U | 0.412 | No |
| AC32 | 4.16 (0.75) | 4.08 (0.80) | Mann-Whitney U | 0.603 | No |
| AC33 | 4.23 (0.72) | 3.93 (0.77) | Mann-Whitney U | 0.047 | Yes |
| AC34 | 4.05 (0.87) | 4.08 (0.71) | Mann-Whitney U | 0.909 | No |
| AC35 | 3.47 (0.83) | 3.54 (0.89) | Mann-Whitney U | 0.601 | No |
| AC36 | 3.74 (0.76) | 3.96 (0.79) | Mann-Whitney U | 0.092 | No |
| AC37 | 3.88 (0.88) | 3.86 (0.84) | Mann-Whitney U | 0.872 | No |
| AC38 | 3.81 (0.73) | 3.82 (0.89) | Mann-Whitney U | 0.957 | No |
| AC39 | 3.44 (1.08) | 3.13 (0.88) | Mann-Whitney U | 0.067 | No |
| AC40 | 3.58 (0.96) | 3.41 (1.00) | Mann-Whitney U | 0.417 | No |
| AC41 | 3.84 (0.72) | 3.74 (0.91) | Mann-Whitney U | 0.756 | No |

- Items with significant gender differences: 2/41 (4.9%)

**Table SM3. Item-Level Comparison of Leadership Competencies by University Type Using Mann-Whitney U Test** (Government vs. Private Universities)

| Item | Government [N=81]  Mean (SD) | Private [N=38]  Mean (SD) | Test Used | p-value | Significant? |
| --- | --- | --- | --- | --- | --- |
| AC1 | 4.65 (0.57) | 4.71 (0.52) | Mann-Whitney U | 0.672 | No |
| AC2 | 3.84 (0.80) | 3.95 (0.84) | Mann-Whitney U | 0.436 | No |
| AC3 | 3.36 (0.99) | 3.42 (0.89) | Mann-Whitney U | 0.751 | No |
| AC4 | 3.78 (0.92) | 3.55 (0.86) | Mann-Whitney U | 0.151 | No |
| AC5 | 3.99 (0.86) | 3.66 (0.99) | Mann-Whitney U | 0.089 | No |
| AC6 | 4.15 (0.76) | 3.97 (0.64) | Mann-Whitney U | 0.141 | No |
| AC7 | 4.12 (0.89) | 4.00 (0.70) | Mann-Whitney U | 0.262 | No |
| AC8 | 4.04 (0.81) | 3.71 (0.69) | Mann-Whitney U | 0.030 | Yes |
| AC9 | 4.37 (0.68) | 4.32 (0.74) | Mann-Whitney U | 0.772 | No |
| AC10 | 3.72 (0.79) | 3.71 (0.98) | Mann-Whitney U | 0.908 | No |
| AC11 | 4.37 (0.62) | 4.05 (0.61) | Mann-Whitney U | 0.007 | Yes |
| AC12 | 3.80 (0.99) | 3.55 (1.03) | Mann-Whitney U | 0.176 | No |
| AC13 | 4.07 (0.79) | 3.71 (0.73) | Mann-Whitney U | 0.018 | Yes |
| AC14 | 4.25 (0.60) | 4.11 (0.69) | Mann-Whitney U | 0.300 | No |
| AC15 | 3.91 (0.79) | 3.92 (0.75) | Mann-Whitney U | 0.903 | No |
| AC16 | 3.84 (0.89) | 3.63 (0.88) | Mann-Whitney U | 0.221 | No |
| AC17 | 4.09 (0.82) | 4.00 (0.90) | Mann-Whitney U | 0.639 | No |
| AC18 | 4.19 (0.63) | 4.18 (0.61) | Mann-Whitney U | 0.969 | No |
| AC19 | 4.21 (0.68) | 4.11 (0.61) | Mann-Whitney U | 0.330 | No |
| AC20 | 3.81 (0.88) | 3.82 (0.69) | Mann-Whitney U | 0.849 | No |
| AC21 | 4.31 (0.72) | 4.00 (0.81) | Mann-Whitney U | 0.038 | Yes |
| AC22 | 3.85 (0.85) | 3.74 (0.79) | Mann-Whitney U | 0.386 | No |
| AC23 | 4.09 (0.76) | 4.00 (0.77) | Mann-Whitney U | 0.499 | No |
| AC24 | 4.07 (0.69) | 3.95 (0.70) | Mann-Whitney U | 0.410 | No |
| AC25 | 3.88 (0.80) | 3.68 (0.66) | Mann-Whitney U | 0.149 | No |
| AC26 | 4.06 (0.73) | 3.95 (0.80) | Mann-Whitney U | 0.602 | No |
| AC27 | 4.22 (0.88) | 4.00 (0.84) | Mann-Whitney U | 0.106 | No |
| AC28 | 4.27 (0.69) | 3.84 (0.75) | Mann-Whitney U | 0.003 | Yes |
| AC29 | 4.20 (0.62) | 4.08 (0.63) | Mann-Whitney U | 0.384 | No |
| AC30 | 4.28 (0.66) | 4.05 (0.77) | Mann-Whitney U | 0.117 | No |
| AC31 | 4.04 (0.73) | 3.97 (0.79) | Mann-Whitney U | 0.752 | No |
| AC32 | 4.12 (0.75) | 4.08 (0.85) | Mann-Whitney U | 0.913 | No |
| AC33 | 4.02 (0.74) | 4.08 (0.82) | Mann-Whitney U | 0.665 | No |
| AC34 | 4.06 (0.76) | 4.08 (0.78) | Mann-Whitney U | 0.921 | No |
| AC35 | 3.52 (0.90) | 3.50 (0.80) | Mann-Whitney U | 0.954 | No |
| AC36 | 3.95 (0.80) | 3.74 (0.72) | Mann-Whitney U | 0.119 | No |
| AC37 | 3.94 (0.90) | 3.71 (0.73) | Mann-Whitney U | 0.098 | No |
| AC38 | 3.84 (0.83) | 3.76 (0.85) | Mann-Whitney U | 0.668 | No |
| AC39 | 3.32 (1.00) | 3.08 (0.88) | Mann-Whitney U | 0.196 | No |
| AC40 | 3.54 (1.03) | 3.32 (0.87) | Mann-Whitney U | 0.224 | No |
| AC41 | 3.85 (0.88) | 3.61 (0.75) | Mann-Whitney U | 0.086 | No |

- Items with significant university type differences: 5/41 (12.2%)

**Table SM4. Descriptive Statistics for Leadership Competencies by APP Bracket (Mean and Standard Deviation)**

| **Competency** | **High APP** | | **Medium APP** | | **Low APP** | |
| --- | --- | --- | --- | --- | --- | --- |
| **Mean** | **SD** | **Mean** | **SD** | **Mean** | **SD** |
| AC1 | 4.69 | 0.56 | 4.65 | 0.57 | 4.78 | 0.44 |
| AC2 | 3.89 | 0.78 | 3.82 | 0.85 | 4.22 | 0.67 |
| AC3 | 3.31 | 0.85 | 3.31 | 1.01 | 4.22 | 0.67 |
| AC4 | 3.98 | 0.81 | 3.49 | 0.95 | 3.89 | 0.60 |
| AC5 | 4.02 | 0.87 | 3.82 | 0.92 | 3.67 | 1.12 |
| AC6 | 4.20 | 0.66 | 4.03 | 0.77 | 4.00 | 0.71 |
| AC7 | 4.18 | 0.89 | 4.05 | 0.82 | 3.89 | 0.60 |
| AC8 | 4.18 | 0.68 | 3.78 | 0.86 | 3.78 | 0.44 |
| AC9 | 4.42 | 0.62 | 4.29 | 0.76 | 4.44 | 0.53 |
| AC10 | 3.76 | 0.83 | 3.68 | 0.89 | 3.78 | 0.83 |
| AC11 | 4.40 | 0.54 | 4.20 | 0.71 | 4.11 | 0.33 |
| AC12 | 3.93 | 0.99 | 3.60 | 1.03 | 3.56 | 0.88 |
| AC13 | 4.20 | 0.76 | 3.83 | 0.80 | 3.67 | 0.50 |
| AC14 | 4.27 | 0.58 | 4.20 | 0.67 | 3.89 | 0.60 |
| AC15 | 4.04 | 0.71 | 3.85 | 0.83 | 3.78 | 0.67 |
| AC16 | 3.91 | 0.87 | 3.71 | 0.93 | 3.56 | 0.53 |
| AC17 | 4.22 | 0.77 | 4.02 | 0.91 | 3.56 | 0.53 |
| AC18 | 4.18 | 0.58 | 4.22 | 0.65 | 4.00 | 0.71 |
| AC19 | 4.22 | 0.64 | 4.18 | 0.68 | 3.89 | 0.60 |
| AC20 | 3.93 | 0.75 | 3.74 | 0.91 | 3.78 | 0.44 |
| AC21 | 4.40 | 0.65 | 4.09 | 0.84 | 4.11 | 0.33 |
| AC22 | 4.00 | 0.85 | 3.66 | 0.82 | 4.00 | 0.71 |
| AC23 | 4.20 | 0.66 | 3.98 | 0.84 | 3.89 | 0.60 |
| AC24 | 4.13 | 0.69 | 3.98 | 0.72 | 3.89 | 0.33 |
| AC25 | 4.00 | 0.80 | 3.69 | 0.73 | 3.78 | 0.67 |
| AC26 | 4.07 | 0.72 | 4.02 | 0.80 | 3.89 | 0.60 |
| AC27 | 4.27 | 0.69 | 4.09 | 0.80 | 4.33 | 0.50 |
| AC28 | 4.31 | 0.60 | 4.08 | 0.80 | 4.00 | 0.71 |
| AC29 | 4.22 | 0.52 | 4.09 | 0.70 | 4.11 | 0.78 |
| AC30 | 4.33 | 0.52 | 4.15 | 0.70 | 4.00 | 0.71 |
| AC31 | 4.02 | 0.84 | 4.02 | 0.70 | 3.89 | 0.60 |
| AC32 | 4.22 | 0.60 | 4.03 | 0.88 | 3.56 | 0.53 |
| AC33 | 4.16 | 0.74 | 3.97 | 0.79 | 3.78 | 0.67 |
| AC34 | 4.18 | 0.61 | 4.02 | 0.87 | 3.78 | 0.67 |
| AC35 | 3.69 | 0.85 | 3.38 | 0.90 | 3.44 | 0.53 |
| AC36 | 4.11 | 0.68 | 3.74 | 0.83 | 3.22 | 0.67 |
| AC37 | 3.96 | 0.98 | 3.82 | 0.79 | 3.56 | 0.53 |
| AC38 | 3.91 | 0.76 | 3.80 | 0.90 | 3.78 | 0.67 |
| AC39 | 3.24 | 0.98 | 3.25 | 1.00 | 3.44 | 0.53 |
| AC40 | 3.64 | 1.00 | 3.34 | 1.00 | 3.56 | 0.53 |
| AC41 | 3.89 | 0.80 | 3.69 | 0.90 | 3.78 | 0.67 |

Note: Means and standard deviations (SD) are reported for high, medium, and low APP brackets for each leadership competency.

**Table SM5. Kruskal-Wallis Test Results for Individual Leadership Competencies Across APP Brackets**

Note: Post-hoc analyses were conducted using Dunn’s test with Bonferroni correction where applicable. Effect sizes are reported as eta-squared (η²_H).

| **Competency** | **Statistic** | **p-value** | **Effect Size (η² _H** | **Post-hoc (Significant Differences Only)** |
| --- | --- | --- | --- | --- |
| AC1 | 0.449 | 0.799 | -0.013 | Not applicable |
| AC2 | 2.068 | 0.356 | 0.001 | Not applicable |
| **AC3** | 7.871 | **0.020** | 0.051 | High–Low (p=0.025), Medium–Low (p=0.017) |
| **AC4** | 7.658 | **0.022** | 0.049 | High–Medium (p=0.020) |
| AC5 | 1.563 | 0.458 | -0.004 | Not applicable |
| AC6 | 1.662 | 0.436 | -0.003 | Not applicable |
| AC7 | 1.922 | 0.383 | -0.001 | Not applicable |
| **AC8** | 6.731 | **0.035** | 0.041 | High–Medium (p=0.037) |
| AC9 | 0.534 | 0.766 | -0.013 | Not applicable |
| AC10 | 0.100 | 0.951 | -0.016 | Not applicable |
| AC11 | 3.046 | 0.218 | 0.009 | Not applicable |
| AC12 | 3.157 | 0.206 | 0.010 | Not applicable |
| **AC13** | 7.110 | **0.029** | 0.044 | High–Medium (p=0.054) (marginal), High–Low (p=0.170) |
| AC14 | 2.588 | 0.274 | 0.005 | Not applicable |
| AC15 | 2.060 | 0.357 | 0.001 | Not applicable |
| AC16 | 2.034 | 0.362 | 0.000 | Not applicable |
| **AC17** | 6.049 | **0.049** | 0.035 | High–Low (p=0.045) |
| AC18 | 0.931 | 0.628 | -0.009 | Not applicable |
| AC19 | 2.202 | 0.333 | 0.002 | Not applicable |
| AC20 | 1.119 | 0.572 | -0.008 | Not applicable |
| AC21 | 4.631 | 0.099 | 0.023 | Not applicable |
| AC22 | 5.087 | 0.079 | 0.027 | Not applicable |
| AC23 | 2.349 | 0.309 | 0.003 | Not applicable |
| AC24 | 1.680 | 0.432 | -0.003 | Not applicable |
| AC25 | 4.377 | 0.112 | 0.020 | Not applicable |
| AC26 | 0.502 | 0.778 | -0.013 | Not applicable |
| AC27 | 0.825 | 0.662 | -0.010 | Not applicable |
| AC28 | 5.785 | 0.055 | 0.033 | Not applicable |
| AC29 | 1.351 | 0.509 | -0.006 | Not applicable |
| AC30 | 1.927 | 0.382 | -0.001 | Not applicable |
| AC31 | 0.074 | 0.964 | -0.017 | Not applicable |
| AC32 | 0.796 | 0.672 | -0.010 | Not applicable |
| AC33 | 1.676 | 0.433 | -0.003 | Not applicable |
| AC34 | 1.428 | 0.490 | -0.005 | Not applicable |
| AC35 | 2.786 | 0.248 | 0.007 | Not applicable |
| AC36 | 5.528 | 0.063 | 0.030 | Not applicable |
| AC37 | 1.639 | 0.441 | -0.003 | Not applicable |
| AC38 | 3.015 | 0.221 | 0.009 | Not applicable |
| AC39 | 0.030 | 0.985 | -0.017 | Not applicable |
| AC40 | 2.933 | 0.231 | 0.008 | Not applicable |
| AC41 | 1.447 | 0.485 | -0.005 | Not applicable |

**Table SM6.** Differences in Leadership Domains Across APP Brackets: Test Statistics, p-Values, and Effect Sizes (Post-hoc results for the significant domain are provided in Table SM7.)

(this table similar to table 5 in the paper but gives more details about statistic and effect size)

| **Domain** | **Test** | **Statistic** | **p-value** | **Effect Size** | **Status** |
| --- | --- | --- | --- | --- | --- |
| Demonstrating Personal Qualities | Kruskal-Wallis | 4.029 | 0.133 | 0.017 | Not Significant |
| Working with Others | ANOVA | 3.421 | 0.036 | 0.056 | Significant (see table SM7) |
| Managing Services | ANOVA | 2.198 | 0.116 | 0.037 | Not Significant |
| Improving Services | ANOVA | 1.529 | 0.221 | 0.026 | Not Significant |
| Setting Direction | ANOVA | 1.445 | 0.240 | 0.024 | Not Significant |

**Table SM7. Post-hoc Pairwise Comparisons for *“Working with Others***” **Domain Scores Using Tukey HSD Test**

| **Group 1** | **Group 2** | **Mean Difference** | **Adjusted p-value** | **Lower CI** | **Upper CI** | **Reject Null?** |
| --- | --- | --- | --- | --- | --- | --- |
| High | Low | -0.381 | 0.081 | -0.797 | 0.036 | False |
| High | Medium | -0.193 | 0.101 | -0.414 | 0.029 | False |
| Low | Medium | 0.188 | 0.516 | -0.218 | 0.594 | False |

The end
